# Supplementary material for: Semiconductive donor promoted photochromism of iodoplumbate hybrids
Source: Royal Society of Chemistry journal article supplement (doi:10.1039/d0qi00948b), 2020-01-01
Supplement: d0qi00948b1.pdf [file d0qi00948b1.pdf]

## Electronic Supplementary Information

# Semiconductive donor promoted photochromism of iodoplumbate hybrids

Junju Shen, Xiaoli Kang, Pengfei Hao and Yunlong Fu\*

Key Laboratory of Magnetic Molecules & Magnetic Information Materials Ministry of Education,  
School of Chemistry & Material Science, Shanxi Normal University, Linfen 041004, China.

\*Corresponding author.

E-mail: [yunlongfu@sxnu.edu.cn](mailto:yunlongfu@sxnu.edu.cn)

### Contents

|                                                                                                                  |    |
|------------------------------------------------------------------------------------------------------------------|----|
| <b>1. Figures</b> .....                                                                                          | 2  |
| <b>Fig. S1</b> Thermogravimetric (TG ) curves of <b>1</b> and <b>2</b> .....                                     | 2  |
| <b>Fig. S2</b> The asymmetric units of <b>1</b> and <b>2</b> .....                                               | 3  |
| <b>Fig. S3</b> Powder X-ray diffraction (PXRD) patterns of <b>1</b> and <b>2</b> .....                           | 4  |
| <b>Fig. S4</b> UV-vis absorption spectra of <b>1</b> and <b>2</b> before and after irradiation .....             | 5  |
| <b>Fig. S5</b> Optical band gaps of <b>1</b> and <b>2</b> .....                                                  | 6  |
| <b>Fig. S6</b> IR spectra of <b>1</b> and <b>2</b> before and after irradiation .....                            | 7  |
| <b>Fig. S7</b> The calculated UV-vis spectra of [MNH] <sup>2+</sup> cation and [MNH] <sup>+•</sup> radical ..... | 8  |
| <b>Fig. S8</b> EPR spectra of <b>2</b> before and after irradiation .....                                        | 8  |
| <b>2. Tables</b> .....                                                                                           | 9  |
| <b>Table S1</b> Crystallographic data and refinement parameters of <b>1</b> and <b>2</b> .....                   | 9  |
| <b>Table S2</b> Selected distances (Å) and angles (°) of <b>1</b> and <b>2</b> .....                             | 10 |
| <b>Table S3</b> Density functional theory (DFT) calculations for two cations.....                                | 11 |
| <b>Reference</b> .....                                                                                           | 12 |

## 1. Figures

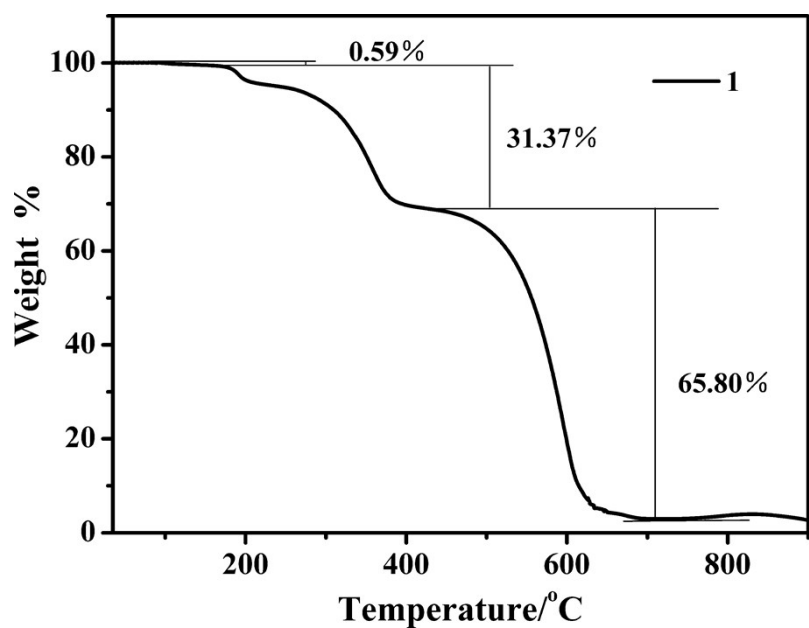

(a)

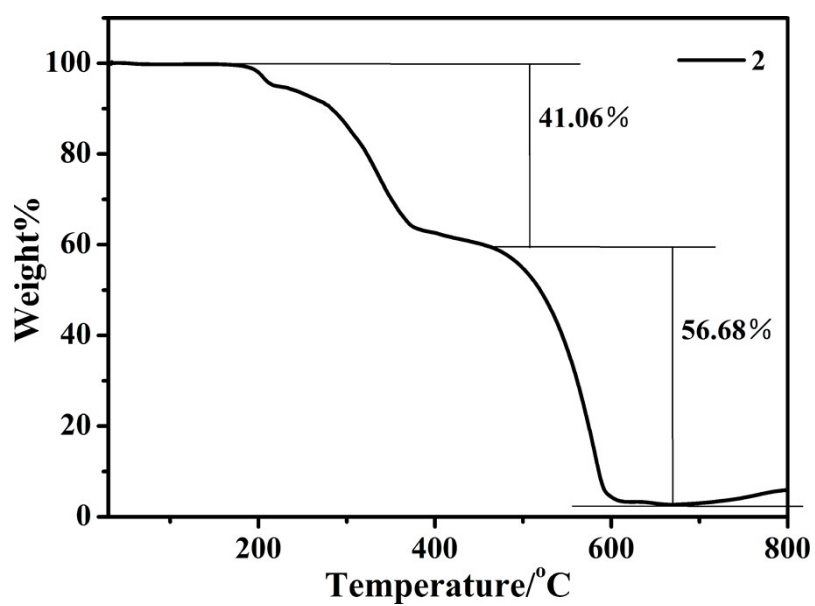

(b)

Fig. S1 Thermogravimetric (TG) curves of 1 and 2.

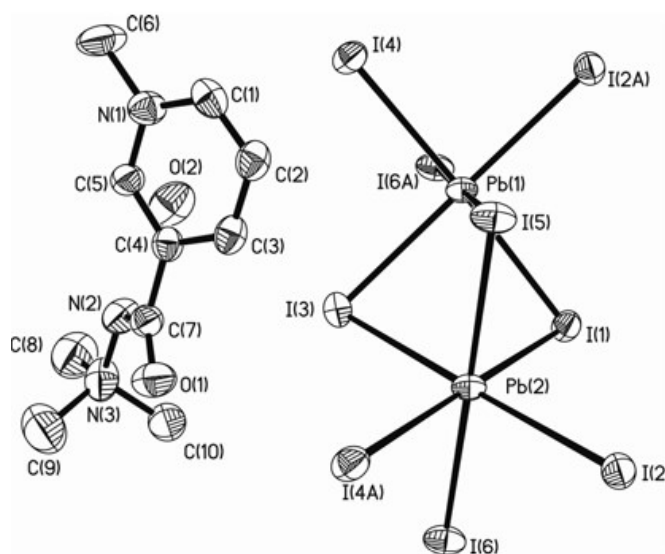

Compound 1

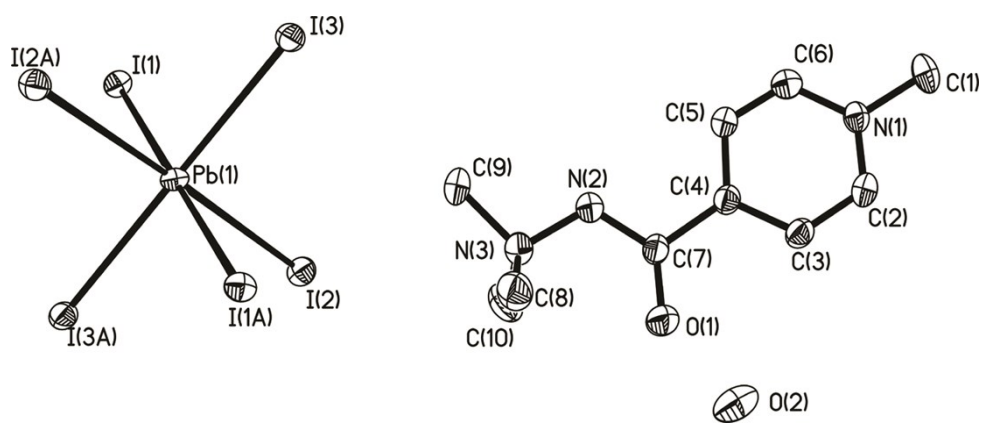

Compound 2

**Fig. S2** The asymmetric units of **1** and **2**.

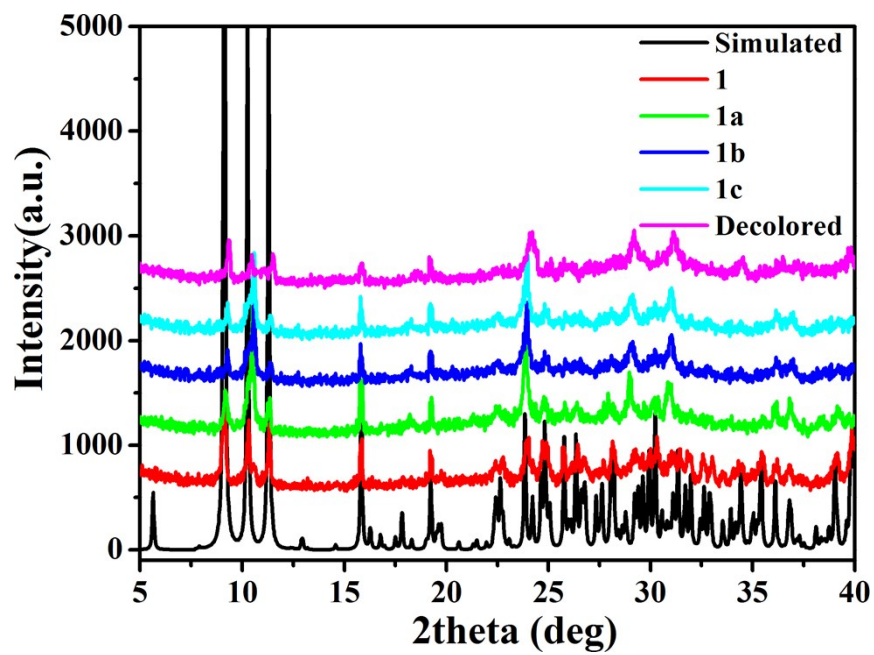

(a)

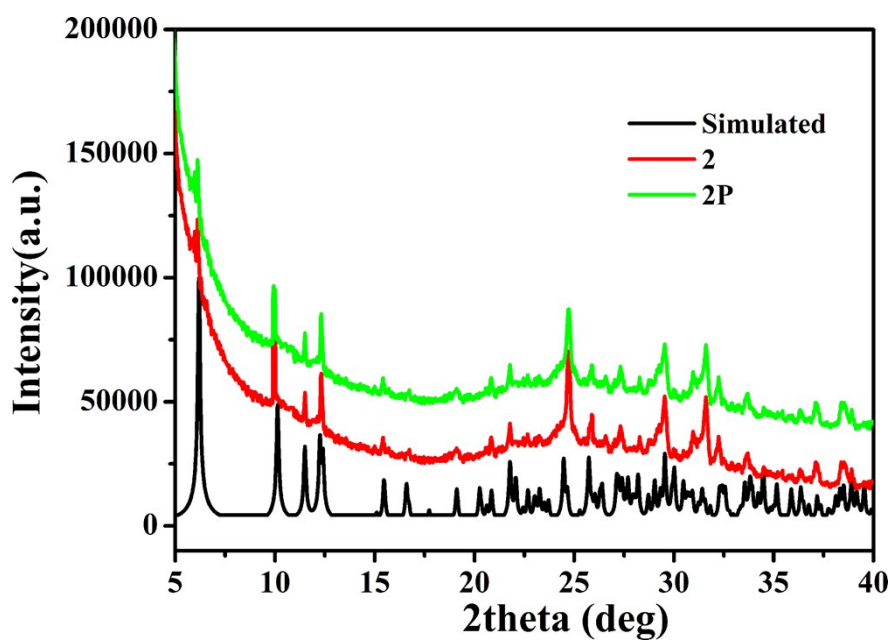

(b)

Fig. S3 Powder X-ray diffraction (PXRD) patterns of 1 and 2.

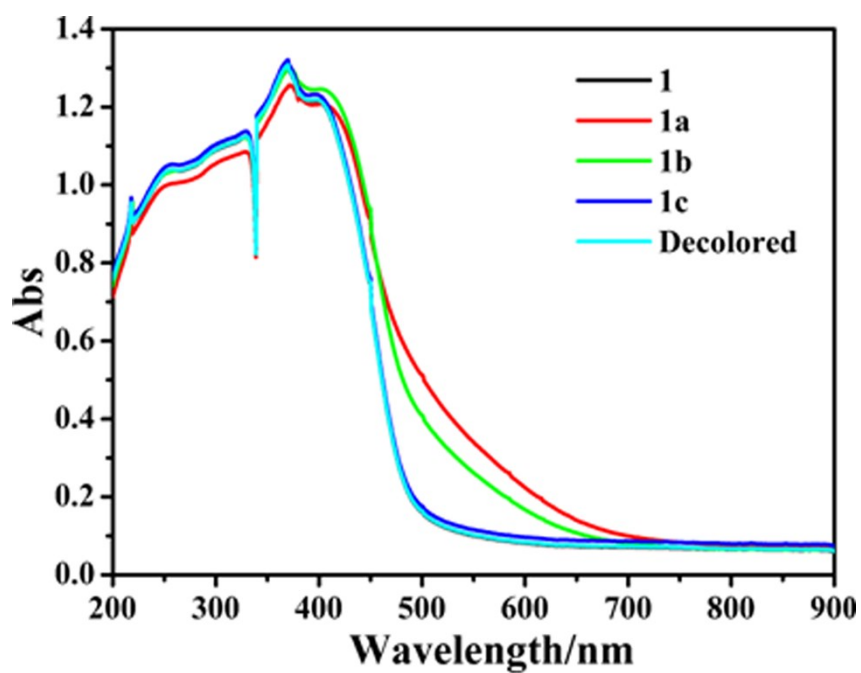

(a)

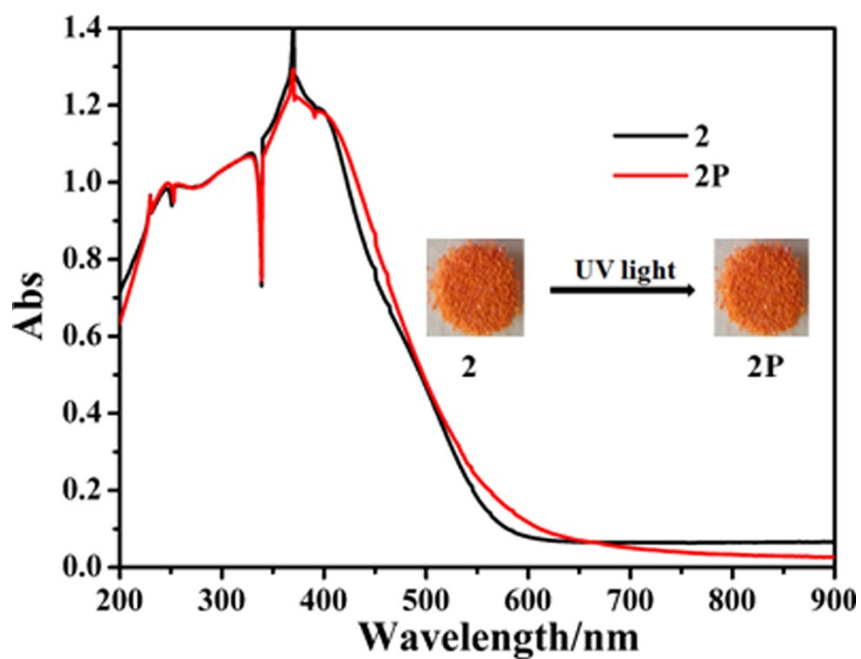

(b)

Fig. S4 UV-vis absorption spectra of 1 and 2 before and after irradiation.

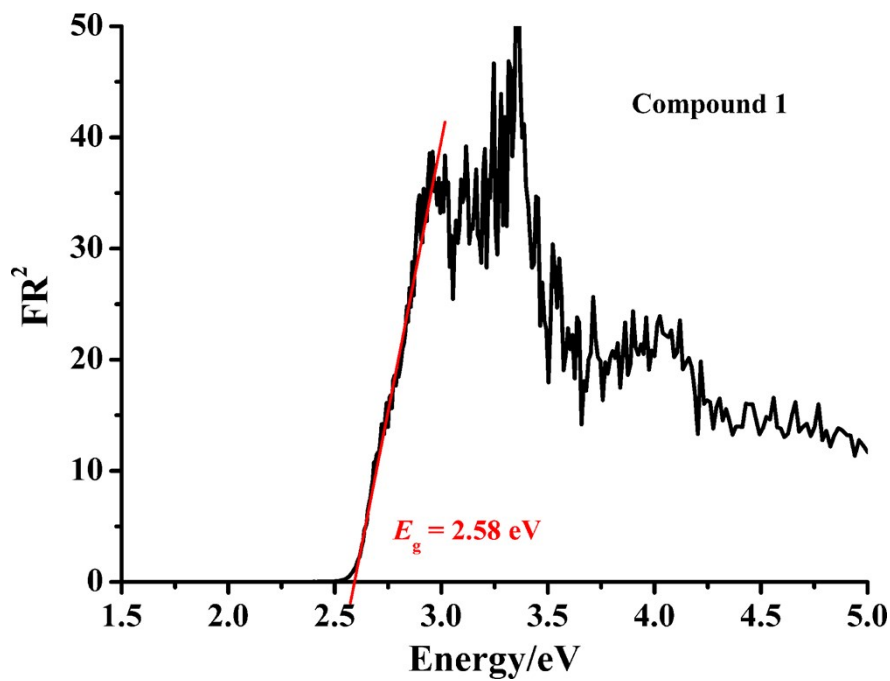

(a)

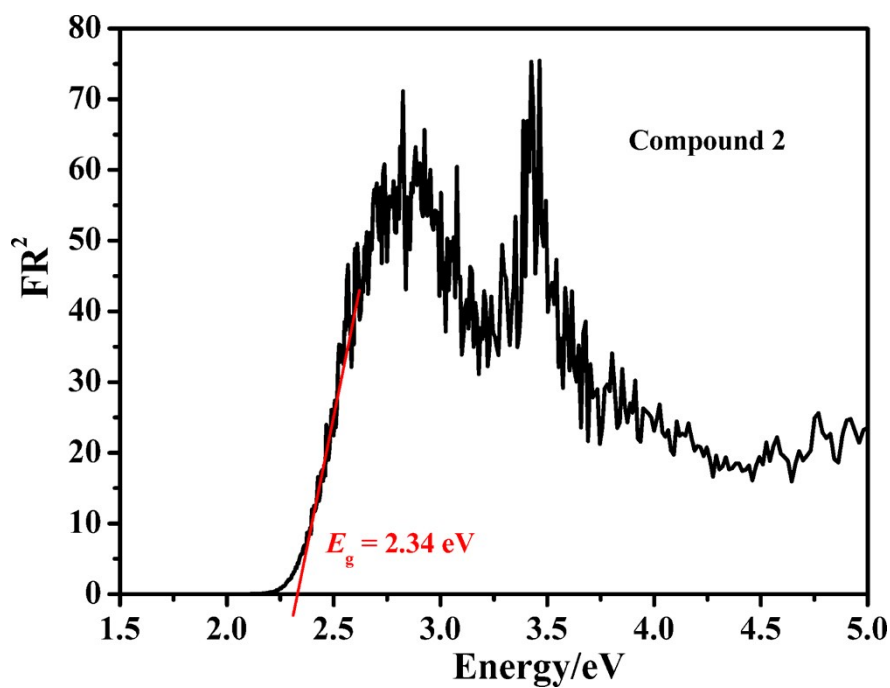

(b)

Fig. S5 Optical band gaps of 1 and 2

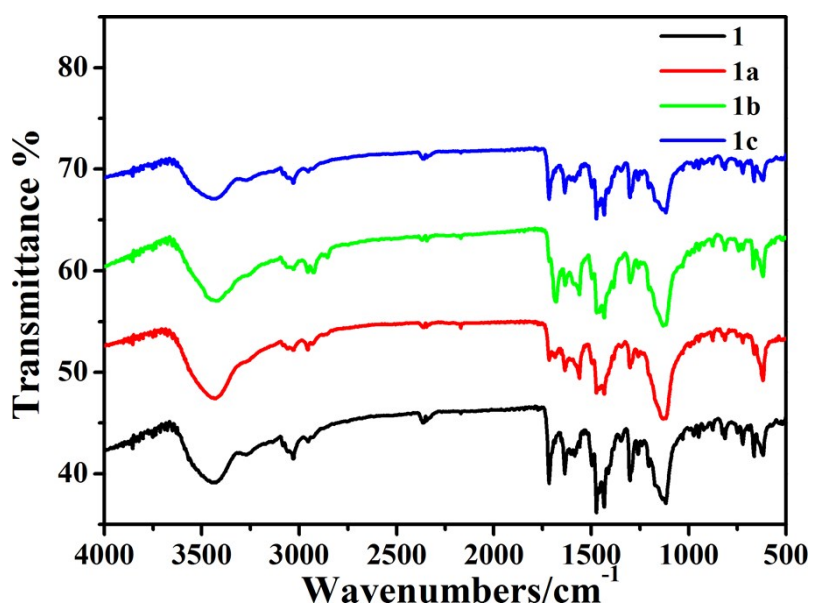

(a)

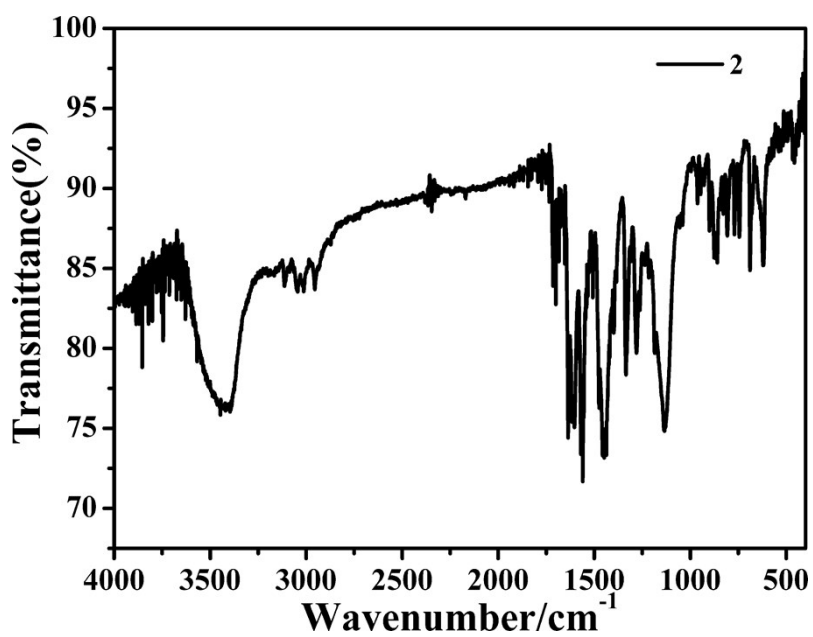

(b)

Fig. S6 IR spectra of 1 and 2 before and after irradiation

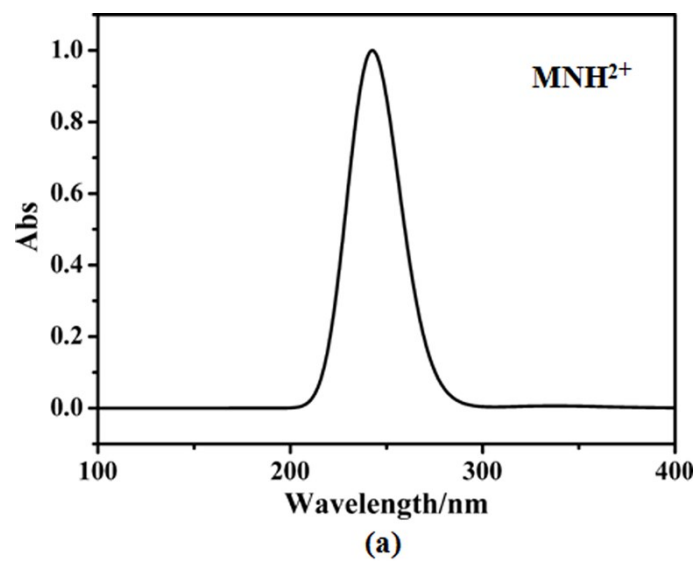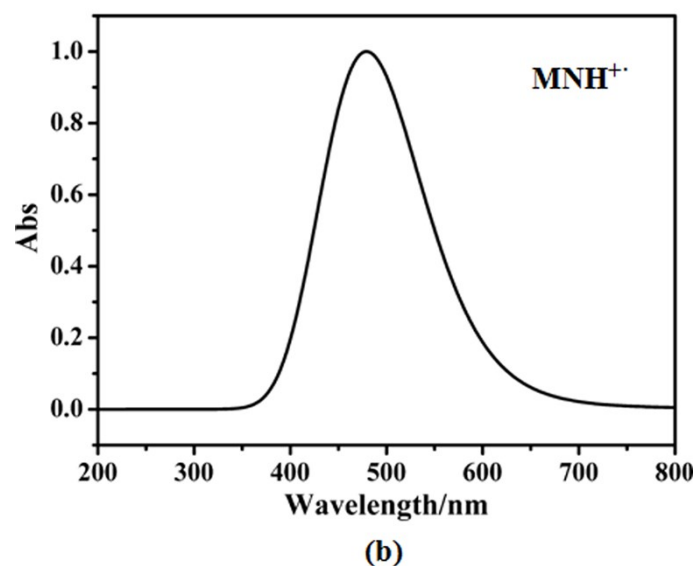

**Fig. S7** The calculated UV-vis spectra of  $[\text{MNH}]^{2+}$  cation (a) and  $[\text{MNH}]^{\cdot+}$  radical (b) through density functional theory (DFT) computations using the Gaussian 09 suite of programs<sup>[1]</sup>. A hybrid functional B3LYP was used for all calculations.

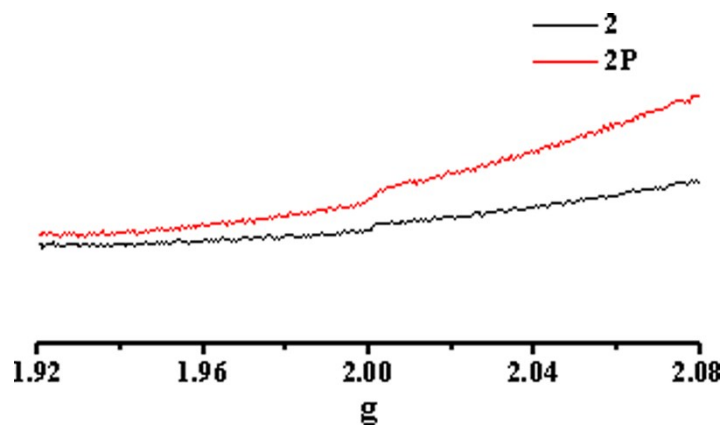

**Fig. S8** EPR spectra of **2** before and after irradiation



## 2. Tables

**Table S1** Crystallographic data and refinement parameters of **1** and **2**

| Compound                                                                                     | <b>1</b>                                                                                      | <b>2</b>                                                                       |
|----------------------------------------------------------------------------------------------|-----------------------------------------------------------------------------------------------|--------------------------------------------------------------------------------|
| CCDC code                                                                                    | 1975873                                                                                       | 2016978                                                                        |
| Temperature (K)                                                                              | 273(2)                                                                                        | 273(2)                                                                         |
| Empirical formula                                                                            | C <sub>20</sub> H <sub>34</sub> N <sub>6</sub> O <sub>3</sub> Pb <sub>4</sub> I <sub>12</sub> | C <sub>10</sub> H <sub>17</sub> N <sub>3</sub> O <sub>2</sub> PbI <sub>3</sub> |
| Formula weight                                                                               | 2758.13                                                                                       | 799.16                                                                         |
| Crystal size (mm)                                                                            | 0.52 x 0.12 x 0.01                                                                            | 0.56 x 0.082 x 0.018                                                           |
| Crystal system                                                                               | Triclinic                                                                                     | Monoclinic                                                                     |
| Space group                                                                                  | <i>P</i> $\bar{1}$                                                                            | <i>P</i> 2(1)/ <i>c</i>                                                        |
| <i>a</i> (Å)                                                                                 | 7.9265(6)                                                                                     | 14.2985(9)                                                                     |
| <i>b</i> (Å)                                                                                 | 11.5631(9)                                                                                    | 7.9199(5)                                                                      |
| <i>c</i> (Å)                                                                                 | 15.8748(12)                                                                                   | 17.4889(12)                                                                    |
| $\alpha$ (°)                                                                                 | 81.696(2)                                                                                     | 90                                                                             |
| $\beta$ (°)                                                                                  | 83.649(2)                                                                                     | 94.076(2)                                                                      |
| $\gamma$ (°)                                                                                 | 77.133(2)                                                                                     | 90                                                                             |
| <i>V</i> (Å <sup>3</sup> )                                                                   | 1398.95(19)                                                                                   | 1975.5(2)                                                                      |
| <i>Z</i>                                                                                     | 1                                                                                             | 4                                                                              |
| <i>D<sub>c</sub></i> (g cm <sup>-3</sup> )                                                   | 3.274                                                                                         | 2.690                                                                          |
| <i>F</i> (000)                                                                               | 1184                                                                                          | 1424                                                                           |
| $\mu$ (mm <sup>-1</sup> )                                                                    | 18.644                                                                                        | 13.230                                                                         |
| $\theta$ range (°)                                                                           | 2.85 to 28.39                                                                                 | 2.33 to 28.37                                                                  |
| Reflections collected                                                                        | 25156                                                                                         | 26964                                                                          |
| Unique reflections                                                                           | 7030                                                                                          | 4928                                                                           |
| <i>R</i> <sub>int</sub>                                                                      | 0.0410                                                                                        | 0.0296                                                                         |
| Goodness-of-fit on <i>F</i> <sup>2</sup>                                                     | 1.022                                                                                         | 1.240                                                                          |
| <i>R</i> <sub>1</sub> / <i>wR</i> <sub>2</sub> , [ <i>I</i> ≥ 2σ( <i>I</i> )] <sup>a,b</sup> | 0.0413/0.1050                                                                                 | 0.0264/0.0759                                                                  |
| <i>R</i> <sub>1</sub> / <i>wR</i> <sub>2</sub> , (all data)                                  | 0.0703/0.1180                                                                                 | 0.0412/0.0960                                                                  |
| $\Delta\rho_{\max}/\Delta\rho_{\min}$ (e Å <sup>-3</sup> )                                   | 1.903/-1.395                                                                                  | 1.525/-2.021                                                                   |

$$^a R_1 = \sum ||F_o| - |F_c|| / \sum |F_o| \quad ^b wR_2 = [\sum w(F_o^2 - F_c^2)^2 / \sum w(F_o^2)^2]^{1/2}$$

**Table S2** Selected distances (Å) and angles (°) of **1** and **2**

| Compound <b>1</b> |             |                     |            |
|-------------------|-------------|---------------------|------------|
| Pb(1)-I(5)        | 3.1667(7)   | Pb(1)-I(3)          | 3.1881(8)  |
| Pb(1)-I(4)        | 3.1931(7)   | Pb(1)-I(2)#1        | 3.2420(8)  |
| Pb(1)-I(1)        | 3.2648(7)   | Pb(1)-I(6)#1        | 3.2749(8)  |
| Pb(2)-I(2)        | 3.2129(8)   | Pb(2)-I(5)          | 3.2160(7)  |
| Pb(2)-I(3)        | 3.2172(8)   | Pb(2)-I(1)          | 3.2223(8)  |
| Pb(2)-I(4)#2      | 3.2294(8)   | Pb(2)-I(6)          | 3.2424(8)  |
| I(2)-Pb(1)#2      | 3.2420(8)   |                     |            |
| I(4)-Pb(2)#1      | 3.2294(8)   | I(6)-Pb(1)#2        | 3.2749(8)  |
| I(5)-Pb(1)-I(3)   | 86.77(2)    | I(5)-Pb(1)-I(4)     | 94.74(2)   |
| I(3)-Pb(1)-I(4)   | 93.53(2)    | I(5)-Pb(1)-I(2)#1   | 93.17(2)   |
| I(3)-Pb(1)-I(2)#1 | 179.58(2)   | I(4)-Pb(1)-I(2)#1   | 86.88(2)   |
| I(5)-Pb(1)-I(1)   | 86.77(2)    | I(3)-Pb(1)-I(1)     | 83.918(19) |
| I(4)-Pb(1)-I(1)   | 176.97(2)   | I(2)#1-Pb(1)-I(1)   | 95.67(2)   |
| I(5)-Pb(1)-I(6)#1 | 179.65(2)   | I(3)-Pb(1)-I(6)#1   | 93.02(2)   |
| I(4)-Pb(1)-I(6)#1 | 85.55(2)    | I(2)#1-Pb(1)-I(6)#1 | 87.04(2)   |
| I(1)-Pb(1)-I(6)#1 | 92.93(2)    | I(2)-Pb(2)-I(5)     | 93.78(2)   |
| I(2)-Pb(2)-I(3)   | 178.79(2)   | I(5)-Pb(2)-I(3)     | 85.46(2)   |
| I(2)-Pb(2)-I(1)   | 94.88(2)    | I(5)-Pb(2)-I(1)     | 86.67(2)   |
| I(3)-Pb(2)-I(1)   | 84.142(19)  | I(2)-Pb(2)-I(4)#2   | 86.76(2)   |
| I(5)-Pb(2)-I(4)#2 | 96.03(2)    | I(3)-Pb(2)-I(4)#2   | 94.25(2)   |
| I(1)-Pb(2)-I(4)#2 | 176.75(2)   | I(2)-Pb(2)-I(6)     | 88.08(2)   |
| I(5)-Pb(2)-I(6)   | 177.658(19) | I(3)-Pb(2)-I(6)     | 92.67(2)   |
| I(1)-Pb(2)-I(6)   | 91.75(2)    | I(4)#2-Pb(2)-I(6)   | 85.50(2)   |
| Pb(2)-I(1)-Pb(1)  | 75.718(17)  | Pb(2)-I(2)-Pb(1)#2  | 75.347(17) |
| Pb(1)-I(3)-Pb(2)  | 76.862(17)  | Pb(1)-I(4)-Pb(2)#1  | 75.794(18) |
| Pb(1)-I(5)-Pb(2)  | 77.182(17)  | Pb(2)-I(6)-Pb(1)#2  | 74.503(17) |

| Compound 2          |             |                     |            |
|---------------------|-------------|---------------------|------------|
| Pb(1)-I(1)          | 3.2265(5)   | Pb(1)-I(2)          | 3.2825(5)  |
| Pb(1)-I(1)#2        | 3.2379(5)   | Pb(1)-I(2)#1        | 3.1875(5)  |
| Pb(1)-I(3)          | 3.2322(5)   | Pb(1)-I(3)#2        | 3.2077(5)  |
| I(1)-Pb(1)#1        | 3.2379(5)   | I(2)-Pb(1)#2        | 3.1875(5)  |
| I(3)-Pb(1)#1        | 3.2077(5)   |                     |            |
| I(1)-Pb(1)-I(2)     | 97.378(13)  | I(1)-Pb(1)-I(3)     | 89.290(12) |
| I(1)-Pb(1)-I(1)#2   | 179.535(12) | I(1)#2-Pb(1)-I(2)   | 82.776(12) |
| I(2)#1-Pb(1)-I(3)#2 | 93.539(13)  | I(2)#1-Pb(1)-I(1)   | 84.462(12) |
| I(2)#1-Pb(1)-I(3)   | 86.375(13)  | I(2)#1-Pb(1)-I(1)#2 | 95.393(13) |
| I(2)#1-Pb(1)-I(2)   | 177.782(13) | I(3)#2-Pb(1)-I(1)   | 90.929(13) |
| I(3)#2-Pb(1)-I(3)   | 179.756(9)  | I(3)-Pb(1)-I(1)#2   | 90.260(12) |
| I(3)#2-Pb(1)-I(2)   | 85.207(12)  | I(3)-Pb(1)-I(2)     | 94.871(13) |
| I(3)#2-Pb(1)-I(1)#2 | 89.521(12)  | Pb(1)-I(1)-Pb(1)#1  | 75.554(10) |
| Pb(1)#2-I(2)-Pb(1)  | 75.462(10)  | Pb(1)#1-I(3)-Pb(1)  | 75.891(11) |

Symmetry code: for **1**: #1 x-1,y,z; #2 x+1,y,z; for **2**: #1 -x+2,y-1/2,-z+1/2; #2 -x+2,y+1/2,-z+1/2.

**Table S3.** Density functional theory (DFT) calculations for two cations

| Organic cations                                       | LUMO (eV) | HOMO (eV) |
|-------------------------------------------------------|-----------|-----------|
| Methylated nicotinohydrazide (MNH <sup>2+</sup> )     | -9.7126   | -15.1177  |
| Methylated isonicotinohydrazide (MINH <sup>2+</sup> ) | -10.1181  | -15.0970  |

<sup>a</sup>The density functional theory (DFT) calculations were carried out with the Gaussian 09 suite of programs<sup>[1]</sup>. A hybrid functional B3LYP was used for all calculations. Geometry was optimized using the 6-31G basis set.

## Reference

[1] M. J. Frisch, G. W. Trucks, H. B. Schlegel, G. E. Scuseria, M. A. Robb, J. R. Cheeseman, G. Scalmani, V. Barone, B. Mennucci, G. A. Petersson, H. Nakatsuji, M. Caricato, X. Li, H. P. Hratchian, A. F. Izmaylov, J. Bloino, G. Zheng, J. L. Sonnenberg, M. Hada, M. Ehara, K. Toyota, R. Fukuda, J. Hasegawa, M. Ishida, T. Nakajima, Y. Honda, O. Kitao, H. Nakai, T. Vreven, J. A. Montgomery, Jr., J. E. Peralta, F. Ogliaro, M. Bearpark, J. J. Heyd, E. Brothers, K. N. Kudin, V. N. Staroverov, T. Keith, R. Kobayashi, J. Normand, K. Raghavachari, A. Rendell, J. C. Burant, S. S. Iyengar, J. Tomasi, M. Cossi, N. Rega, J. M. Millam, M. Klene, J. E. Knox, J. B. Cross, V. Bakken, C. Adamo, J. Jaramillo, R. Gomperts, R. E. Stratmann, O. Yazyev, A. J. Austin, R. Cammi, C. Pomelli, J. W. Ochterski, R. L. Martin, K. Morokuma, V. G. Zakrzewski, G. A. Voth, P. Salvador, J. J. Dannenberg, S. Dapprich, A. D. Daniels, O. Farkas, J. B. Foresman, J. V. Ortiz, J. Cioslowski, and D. J. Fox, Gaussian 09, Revision D.01, Gaussian Inc., Wallingford, CT, 2013.
